# Supplementary material for: Loss of a single Hic1 allele accelerates polyp formation in ApcΔ716 mice
Source: PubMed Central journal article supplement — Oncogene. 2011 Feb 7;30(23):2659–69. doi: 10.1038/onc.2010.633 (PMC3114184; doi:10.1038/onc.2010.633), 2011-02-07
Supplement: onc2010633x1.pdf [file onc2010633x1.pdf]

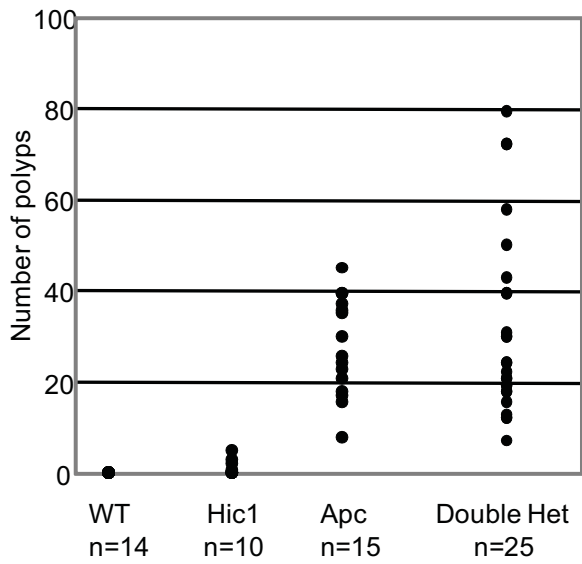

Figure S1. Points represent the number of polyps throughout the entire GI tract, as counted under a dissection microscope, for mice at 90d.
