# Supplementary material for: Loss of a single Hic1 allele accelerates polyp formation in ApcΔ716 mice
Source: PubMed Central journal article supplement — Oncogene. 2011 Feb 7;30(23):2659–69. doi: 10.1038/onc.2010.633 (PMC3114184; doi:10.1038/onc.2010.633), 2011-02-07
Supplement: onc2010633x2.pdf [file onc2010633x2.pdf]

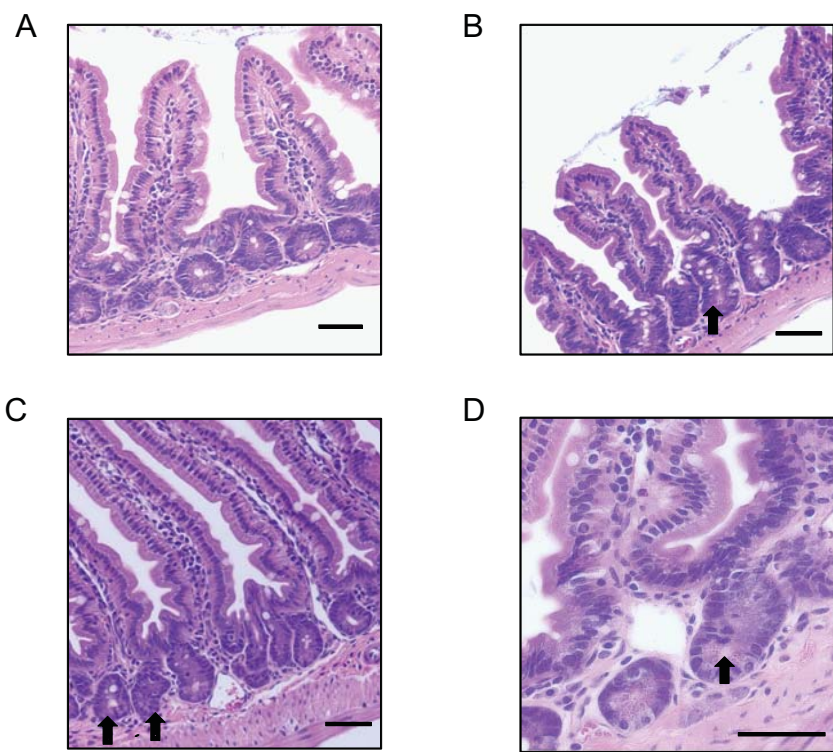

Figure S2. A, H&E staining of WT small intestine. B-D, H&E staining *Hic1*<sup>+/-</sup> small intestine. Arrows indicate features of dysplasia including irregular lumen (B), crypt branching/double lumen (C), and mitotic figures (D). Scale bar = 50 $\mu$ m.
