# Supplementary material for: Loss of a single Hic1 allele accelerates polyp formation in ApcΔ716 mice
Source: PubMed Central journal article supplement — Oncogene. 2011 Feb 7;30(23):2659–69. doi: 10.1038/onc.2010.633 (PMC3114184; doi:10.1038/onc.2010.633), 2011-02-07
Supplement: onc2010633x3.pdf [file onc2010633x3.pdf]

A

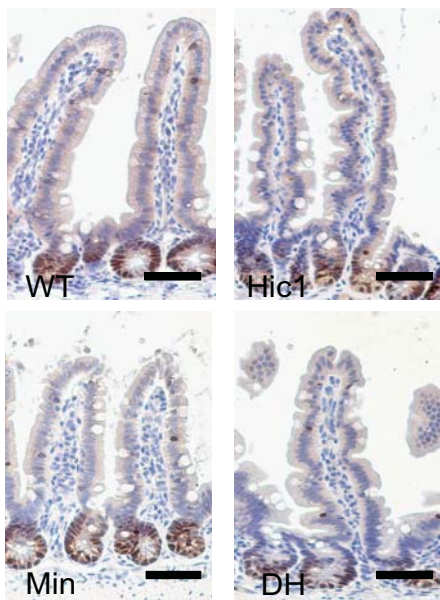

B

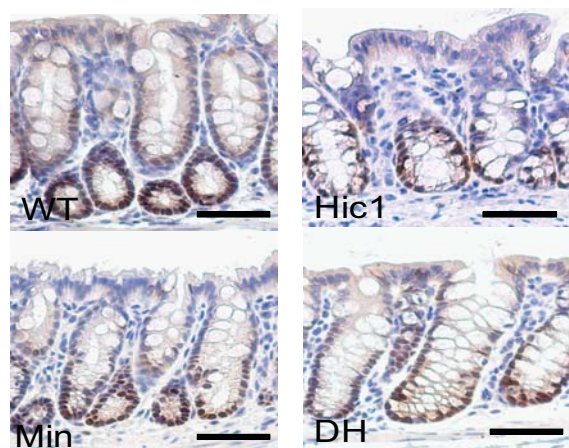

Figure S3. Sox9 Expression Throughout the GI Tract. A, Sox9 immunohistochemistry of paraffin embedded small intestine sections from mice as indicated. B, Sox9 immunohistochemistry of paraffin embedded large intestine sections. Genotypes of mice are as indicated for all panels. Scale bar = 50  $\mu$ m for all panels.
